# Supplementary material for: Systematic study of the substitution effect on the tetrel bond between 1,4-diazabicyclo[2.2.2]octane and TH3X
Source: Royal Society of Chemistry journal article supplement (doi:10.1039/c9ra03351c), 2019-01-01
Supplement: c9ra03351c1.pdf [file c9ra03351c1.pdf]

**Table S1** Change of T-X bond length ( $\Delta r$ , Å) and frequency shift of its stretch vibration ( $\Delta \nu$ ,  $\text{cm}^{-1}$ ) in the  $\text{TH}_3\text{X}$  complexes

|                   | $\Delta r$ |       |       | $\Delta \nu$ |        |       |
|-------------------|------------|-------|-------|--------------|--------|-------|
|                   | T=C        | T=Si  | T=Ge  | T=C          | T=Si   | T=Ge  |
| X=CH <sub>3</sub> | ---        | 0.015 | 0.016 | ---          | -22.3  | -21.2 |
| X=H               | ---        | 0.016 | 0.019 | ---          | -83.4  | -77.3 |
| X=NH <sub>2</sub> | 0.001      | 0.027 | 0.027 | -5.5         | -68.1  | -69.7 |
| X=OH              | 0.003      | 0.036 | 0.041 | -8.7         | -80.8  | -74.5 |
| X=I               | 0.007      | 0.128 | 0.115 | -10.7        | -67.5  | -56.4 |
| X=Br              | 0.008      | 0.104 | 0.096 | -15.3        | -79.9  | -62.7 |
| X=Cl              | 0.008      | 0.089 | 0.085 | -20.9        | -104.1 | -79.3 |
| X=F               | 0.006      | 0.044 | 0.051 | -25.4        | -101.6 | -89.4 |
| X=CN              | 0.001      | 0.061 | 0.063 | -3.5         | -83.0  | -67.5 |
| X=NO <sub>2</sub> | 0.001      | 0.068 | 0.073 | -3.1         | -39.0  | -49.3 |

**Table S2** Deformation energy (DE, kcal/mol) in the  $\text{TH}_3\text{X}$  complexes

| T=C               | DE  | T=Si              | DE  | T=Ge              | DE  |
|-------------------|-----|-------------------|-----|-------------------|-----|
| X=CH <sub>3</sub> | --- | X=CH <sub>3</sub> | 1.7 | X=CH <sub>3</sub> | 1.2 |
| X=H               | --- | X=H               | 1.7 | X=H               | 1.2 |
| X=NH <sub>2</sub> | 0.5 | X=NH <sub>2</sub> | 3.8 | X=NH <sub>2</sub> | 2.4 |
| X=OH              | 0.5 | X=OH              | 5.5 | X=OH              | 3.8 |
| X=I               | 0.5 | X=I               | 9.3 | X=I               | 6.2 |
| X=Br              | 0.5 | X=Br              | 8.7 | X=Br              | 5.8 |
| X=Cl              | 0.5 | X=Cl              | 8.2 | X=Cl              | 5.6 |
| X=F               | 0.5 | X=F               | 6.9 | X=F               | 5.1 |
| X=CN              | 0.5 | X=CN              | 6.7 | X=CN              | 4.2 |
| X=NO <sub>2</sub> | 0.5 | X=NO <sub>2</sub> | 9.4 | X=NO <sub>2</sub> | 6.9 |

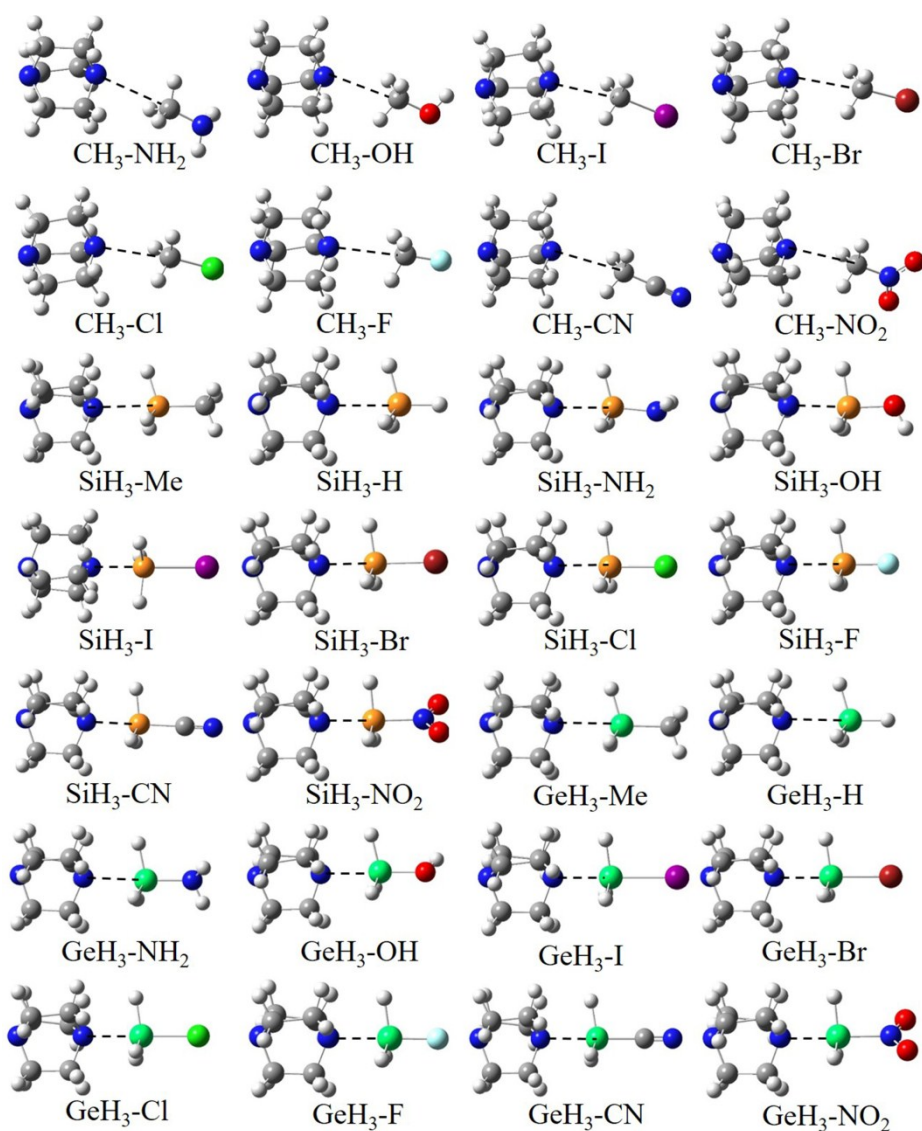

**Fig. S1** Optimized structures of complexes between DABCO and  $\text{TH}_3\text{X}$  ( $\text{T}=\text{C}, \text{Si}, \text{Ge}$ ;  $\text{X} = -\text{Me}, -\text{H}, -\text{OH}, -\text{NH}_2, -\text{F}, -\text{Cl}, -\text{Br}, -\text{I}, -\text{CN}, -\text{NO}_2$ ).

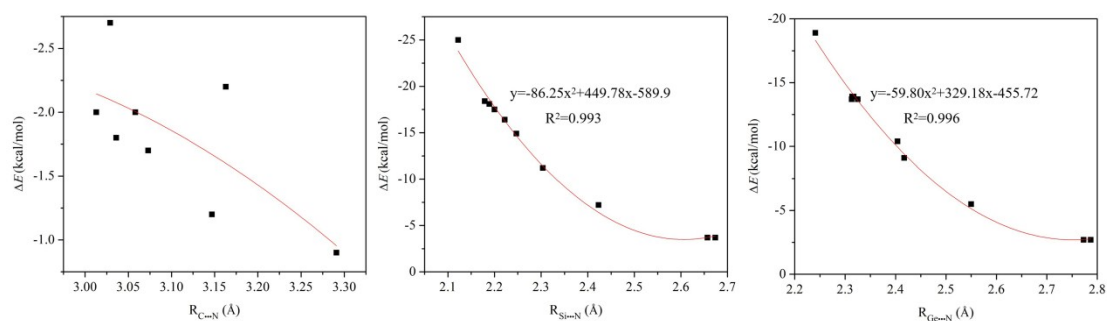

**Fig. S2** Relationship between the interaction energy ( $\Delta E$ ) and the binding distance ( $R$ ) in the complexes

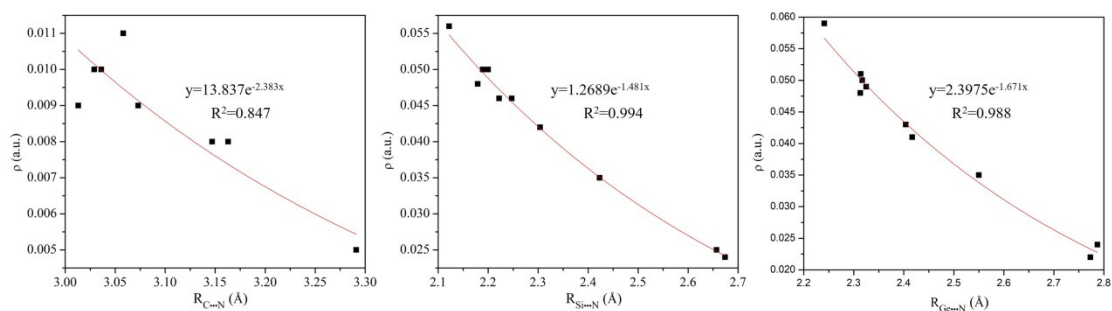

**Fig. S3** Relationship between the electron density ( $\rho$ ) and the binding distance ( $R$ ) in the complexes

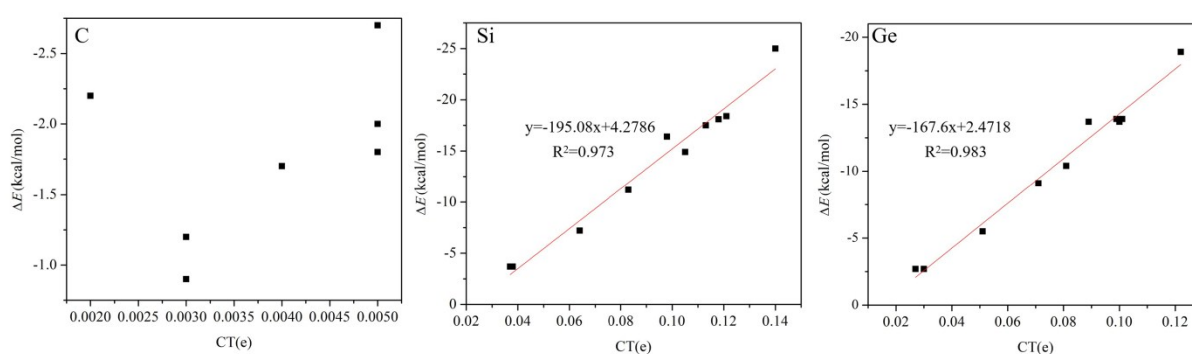

**Fig. S4** Relationship between the interaction energy ( $\Delta E$ ) and the charge transfer ( $CT$ ) in the complexes

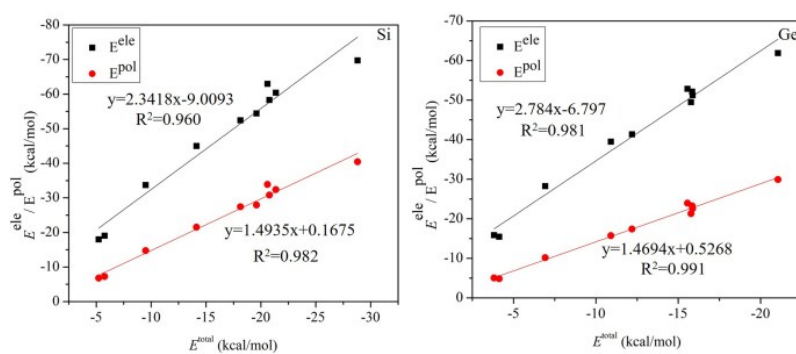

**Fig. S5** Relationship between the total interaction energy ( $E^{total}$ ) and the electrostatic/polarization energy ( $E^{ele}/E^{pol}$ ) in the  $SiH_3X$  and  $GeH_3X$  complexes

### Cartesian coordinates of complexes

#### DABCO-CH<sub>3</sub>NH<sub>2</sub>

|   |             |             |             |
|---|-------------|-------------|-------------|
| C | -0.34817100 | -0.53728800 | 1.24899200  |
| C | -1.73193000 | 0.15117900  | 1.47665200  |
| H | -0.38310200 | -1.60701000 | 1.51650500  |
| H | 0.44272200  | -0.06193800 | 1.85374700  |
| H | -2.41317800 | -0.49459000 | 2.05584900  |
| H | -1.62072600 | 1.10304500  | 2.02292800  |
| C | -0.93243800 | -1.22799600 | -0.96742500 |
| H | -0.69893800 | -1.06055000 | -2.03247000 |
| H | -0.77733600 | -2.29828700 | -0.75038800 |
| C | -2.39040500 | -0.78139000 | -0.62768300 |
| H | -2.97700400 | -0.58982600 | -1.54188000 |
| H | -2.91880100 | -1.55167700 | -0.04096700 |
| C | -1.53685100 | 1.45259000  | -0.52306600 |
| H | -1.95932200 | 1.58521900  | -1.53325400 |
| H | -1.62232700 | 2.41464000  | 0.00954700  |
| C | -0.05412200 | 0.96629000  | -0.58830500 |
| H | 0.35578500  | 1.05606000  | -1.60873000 |
| H | 0.59038700  | 1.55223700  | 0.08850400  |
| N | 0.04080100  | -0.44872700 | -0.17369300 |
| N | -2.37251600 | 0.45645300  | 0.18005900  |
| C | 3.31394300  | -0.12145100 | -0.06653900 |
| H | 2.87676800  | 0.49624600  | -0.86391700 |
| H | 2.79844400  | 0.12697500  | 0.87951200  |
| H | 3.08639300  | -1.16868700 | -0.30808500 |
| N | 4.77528000  | 0.07097300  | -0.05323400 |
| H | 4.99928800  | 1.03680800  | 0.18645600  |
| H | 5.19583300  | -0.50116300 | 0.67896500  |

#### DABCO-CH<sub>3</sub>OH

|   |             |             |             |
|---|-------------|-------------|-------------|
| C | 0.24398600  | 0.58029600  | 1.17696900  |
| C | 1.76784500  | 0.91852100  | 1.12555100  |
| H | -0.37064000 | 1.48195800  | 1.01437500  |
| H | -0.04185300 | 0.14594200  | 2.15002000  |
| H | 1.94019100  | 2.00715400  | 1.16372000  |
| H | 2.30817800  | 0.45950500  | 1.97046400  |
| C | 0.11673000  | 0.26398500  | -1.19145800 |
| H | -0.03098400 | -0.50167100 | -1.97213000 |
| H | -0.65756800 | 1.03827200  | -1.32551100 |
| C | 1.55285300  | 0.87410300  | -1.25835300 |
| H | 2.06622000  | 0.59452300  | -2.19360600 |
| H | 1.52254300  | 1.97532200  | -1.20419600 |
| C | 2.28718800  | -1.07961900 | -0.08581200 |

|   |             |             |             |
|---|-------------|-------------|-------------|
| H | 2.62646000  | -1.45262200 | -1.06689000 |
| H | 2.99207900  | -1.44687500 | 0.67885900  |
| C | 0.82484400  | -1.53620400 | 0.21955200  |
| H | 0.49008300  | -2.31634800 | -0.48487700 |
| H | 0.73630200  | -1.94118200 | 1.24190100  |
| N | -0.10208000 | -0.38936800 | 0.11613700  |
| N | 2.36652800  | 0.39580700  | -0.12070000 |
| C | -3.23806600 | -0.13144700 | 0.05502800  |
| H | -2.70437000 | 0.78195900  | 0.34398800  |
| H | -2.84408000 | -0.47733300 | -0.91427500 |
| H | -3.04501600 | -0.90407200 | 0.81628900  |
| O | -4.63112500 | 0.21880300  | -0.02187100 |
| H | -5.12196400 | -0.57783700 | -0.26008000 |

DABCO-CH<sub>3</sub>I

|   |             |             |             |
|---|-------------|-------------|-------------|
| C | -2.20532900 | -0.05970700 | 1.35609600  |
| C | -3.57080800 | -0.81256900 | 1.26052800  |
| H | -1.39764800 | -0.73532300 | 1.68674300  |
| H | -2.25760500 | 0.78043900  | 2.06907200  |
| H | -3.43225200 | -1.90407800 | 1.33691600  |
| H | -4.25906400 | -0.50075900 | 2.06377300  |
| C | -1.89940700 | -0.59241100 | -0.95632700 |
| H | -1.50545600 | -0.21129400 | -1.91423300 |
| H | -1.22833100 | -1.39683200 | -0.61000400 |
| C | -3.36775400 | -1.10216300 | -1.10700000 |
| H | -3.80026400 | -0.79422800 | -2.07360700 |
| H | -3.41994700 | -2.20200000 | -1.04637700 |
| C | -4.27777700 | 0.92851600  | -0.22315800 |
| H | -4.86828700 | 1.13984600  | -1.13027500 |
| H | -4.82006100 | 1.34911100  | 0.64025800  |
| C | -2.83610100 | 1.52097300  | -0.32984000 |
| H | -2.61082000 | 1.84764600  | -1.35914000 |
| H | -2.70555900 | 2.38892500  | 0.33813300  |
| N | -1.83383400 | 0.49844600  | 0.03873000  |
| N | -4.21802500 | -0.53658300 | -0.03887600 |
| C | 1.23687900  | 0.40049100  | 0.00146300  |
| H | 0.75854900  | -0.25217300 | 0.73744800  |
| H | 0.85507600  | 0.20718800  | -1.00527200 |
| H | 1.11639200  | 1.45313100  | 0.27432300  |
| I | 3.34830300  | -0.04908400 | -0.00032600 |

DABCO-CH<sub>3</sub>Br

|   |            |            |            |
|---|------------|------------|------------|
| C | 1.56113900 | 0.06618900 | 1.34870800 |
| C | 3.07915400 | 0.43351700 | 1.36588700 |

|    |             |             |             |
|----|-------------|-------------|-------------|
| H  | 0.93489300  | 0.94547000  | 1.57839600  |
| H  | 1.32628600  | -0.72013000 | 2.08612200  |
| H  | 3.24803500  | 1.42633500  | 1.81519700  |
| H  | 3.66178200  | -0.30398600 | 1.94286900  |
| C  | 1.31956000  | 0.69662800  | -0.94661300 |
| H  | 1.13117900  | 0.29538000  | -1.95717700 |
| H  | 0.54045000  | 1.44721200  | -0.72894800 |
| C  | 2.75052000  | 1.31246900  | -0.83662800 |
| H  | 3.21742700  | 1.42506300  | -1.82928200 |
| H  | 2.72230700  | 2.30664900  | -0.36003400 |
| C  | 3.54529500  | -0.92735200 | -0.54816400 |
| H  | 3.84062600  | -0.88343400 | -1.60991900 |
| H  | 4.28536400  | -1.54771400 | -0.01560500 |
| C  | 2.10006500  | -1.49732100 | -0.38491900 |
| H  | 1.73358300  | -1.94559500 | -1.32381000 |
| H  | 2.06024200  | -2.27196000 | 0.39943300  |
| N  | 1.16701300  | -0.42025400 | 0.00941300  |
| N  | 3.61783700  | 0.44724000  | -0.01015600 |
| C  | -1.86711000 | -0.30709000 | 0.00720600  |
| H  | -1.39878500 | 0.37500500  | 0.72312600  |
| H  | -1.48739400 | -0.13560500 | -1.00437100 |
| H  | -1.72171700 | -1.34871000 | 0.30832600  |
| Br | -3.78628500 | 0.05956800  | -0.00148500 |

DABCO-CH<sub>3</sub>Cl

|   |             |             |             |
|---|-------------|-------------|-------------|
| C | 0.76136700  | 0.19551500  | 1.33231800  |
| C | 2.20082100  | 0.79528900  | 1.23979900  |
| H | 0.02337100  | 0.96606000  | 1.61444900  |
| H | 0.70970100  | -0.61398900 | 2.08000100  |
| H | 2.17754700  | 1.89761200  | 1.26683500  |
| H | 2.83520900  | 0.44869100  | 2.07256400  |
| C | 0.56190700  | 0.65543700  | -1.00806500 |
| H | 0.14951800  | 0.27600600  | -1.95879700 |
| H | -0.02614300 | 1.54118900  | -0.71230400 |
| C | 2.07936400  | 0.99997800  | -1.14219900 |
| H | 2.49678600  | 0.60574900  | -2.08377500 |
| H | 2.24742800  | 2.08971300  | -1.12600300 |
| C | 2.74868700  | -1.07466100 | -0.15154800 |
| H | 3.33197100  | -1.38704000 | -1.03380000 |
| H | 3.22496500  | -1.51166200 | 0.74211500  |
| C | 1.25463000  | -1.51553200 | -0.27012300 |
| H | 1.01754800  | -1.86171400 | -1.29036100 |
| H | 1.01825200  | -2.33454500 | 0.42991600  |
| N | 0.35962200  | -0.37741900 | 0.02996300  |

|    |             |             |             |
|----|-------------|-------------|-------------|
| N  | 2.84161300  | 0.39523200  | -0.03011600 |
| C  | -2.69419900 | -0.22162800 | 0.00152500  |
| H  | -2.24242900 | 0.37315000  | 0.80172600  |
| H  | -2.29358200 | 0.07328800  | -0.97350200 |
| H  | -2.53294500 | -1.28964400 | 0.17850700  |
| Cl | -4.47184200 | 0.09388600  | -0.00098500 |

DABCO-CH<sub>3</sub>F

|   |             |             |             |
|---|-------------|-------------|-------------|
| C | 0.29046800  | 0.20279400  | 1.34367100  |
| C | 1.84310200  | 0.37151900  | 1.35529900  |
| H | -0.21730300 | 1.16190300  | 1.54360600  |
| H | -0.04362500 | -0.52329700 | 2.10423500  |
| H | 2.13887600  | 1.34637400  | 1.77754400  |
| H | 2.32652100  | -0.41851100 | 1.95404300  |
| C | 0.13000500  | 0.78614300  | -0.97232600 |
| H | -0.10341700 | 0.37768000  | -1.97040800 |
| H | -0.55054900 | 1.63453900  | -0.78534000 |
| C | 1.62644400  | 1.22161700  | -0.87224100 |
| H | 2.10489900  | 1.24858900  | -1.86544300 |
| H | 1.72207700  | 2.22392400  | -0.42212100 |
| C | 2.13093100  | -1.09172500 | -0.51757800 |
| H | 2.42576200  | -1.11562800 | -1.58010900 |
| H | 2.78852000  | -1.78535700 | 0.03253200  |
| C | 0.62599300  | -1.46963800 | -0.33835100 |
| H | 0.20414600  | -1.89904000 | -1.26278300 |
| H | 0.49087100  | -2.20696500 | 0.47102700  |
| N | -0.16313600 | -0.27112200 | 0.01857200  |
| N | 2.37805000  | 0.27748100  | -0.01909800 |
| C | -3.17192500 | -0.10493900 | 0.00758000  |
| H | -2.72477100 | 0.62587700  | 0.69316300  |
| H | -2.79105800 | 0.03864800  | -1.01116300 |
| H | -2.97175000 | -1.12678900 | 0.35234100  |
| F | -4.57263400 | 0.09765700  | -0.00708400 |

DABCO-CH<sub>3</sub>CN

|   |             |             |             |
|---|-------------|-------------|-------------|
| C | 0.58206300  | 0.23088900  | 1.30320500  |
| C | 2.10528900  | 0.57496400  | 1.33463300  |
| H | -0.03348900 | 1.14088900  | 1.41005300  |
| H | 0.30726100  | -0.46307500 | 2.11572700  |
| H | 2.27728400  | 1.60907900  | 1.67665200  |
| H | 2.65344000  | -0.10202200 | 2.01091200  |
| C | 0.43198800  | 0.60045000  | -1.05655900 |
| H | 0.27375100  | 0.08935500  | -2.02165300 |
| H | -0.33986400 | 1.38303400  | -0.95544000 |

|   |             |             |             |
|---|-------------|-------------|-------------|
| C | 1.86886100  | 1.20567600  | -0.96267000 |
| H | 2.37212100  | 1.20049500  | -1.94379700 |
| H | 1.84124500  | 2.24709800  | -0.60084100 |
| C | 2.61190300  | -0.99869600 | -0.39706200 |
| H | 2.94313300  | -1.07853400 | -1.44599000 |
| H | 3.32256500  | -1.56571700 | 0.22694800  |
| C | 1.15236700  | -1.52636500 | -0.22184100 |
| H | 0.81077900  | -2.07457500 | -1.11598200 |
| H | 1.07237700  | -2.20541800 | 0.64382000  |
| N | 0.22445500  | -0.39860600 | 0.01359000  |
| N | 2.69071500  | 0.42637600  | -0.01382800 |
| C | -2.93559000 | -0.25854300 | 0.00150500  |
| H | -2.42021700 | 0.43331500  | 0.68082800  |
| H | -2.52185200 | -0.13196300 | -1.00775500 |
| H | -2.73527800 | -1.28546600 | 0.33413000  |
| C | -4.38234300 | 0.00922500  | -0.00040800 |
| N | -5.54809500 | 0.22621700  | -0.00153800 |

DABCO-CH<sub>3</sub>NO<sub>2</sub>

|   |             |             |             |
|---|-------------|-------------|-------------|
| C | 1.02970000  | -0.03940600 | -1.32447300 |
| C | 2.56819300  | -0.29377200 | -1.40926400 |
| H | 0.46132700  | -0.94954300 | -1.58333900 |
| H | 0.71424500  | 0.76574300  | -2.00984300 |
| H | 2.79088100  | -1.24346800 | -1.92337500 |
| H | 3.07703600  | 0.51666900  | -1.95729600 |
| C | 0.91119800  | -0.80775300 | 0.93972500  |
| H | 0.73735800  | -0.47316300 | 1.97681700  |
| H | 0.17583800  | -1.59808700 | 0.70923900  |
| C | 2.37420000  | -1.31850800 | 0.74557400  |
| H | 2.88255500  | -1.45867200 | 1.71393500  |
| H | 2.39324100  | -2.28204000 | 0.20951100  |
| C | 3.00519800  | 0.98415500  | 0.56742000  |
| H | 3.33459400  | 0.89948300  | 1.61652600  |
| H | 3.68560600  | 1.68351500  | 0.05377200  |
| C | 1.52135800  | 1.46280000  | 0.47648300  |
| H | 1.15697000  | 1.83676400  | 1.44813000  |
| H | 1.40510700  | 2.27210700  | -0.26405200 |
| N | 0.64897700  | 0.34592100  | 0.05201600  |
| N | 3.15212000  | -0.34891200 | -0.05317600 |
| C | -2.37804800 | 0.24753400  | 0.01494000  |
| H | -1.92130300 | -0.35306100 | -0.77813000 |
| H | -2.00024300 | -0.08209200 | 0.98935000  |
| H | -2.22149800 | 1.31897000  | -0.13317100 |
| N | -3.84795300 | -0.02170400 | -0.00506900 |



|   |             |             |             |
|---|-------------|-------------|-------------|
| O | -4.19781500 | -1.21016500 | -0.00037200 |
| O | -4.61900000 | 0.94884600  | -0.01049200 |

DABCO-SiH<sub>3</sub>Me

|    |             |             |             |
|----|-------------|-------------|-------------|
| N  | 0.07476900  | 0.00027500  | 0.00013000  |
| C  | 0.59022000  | 1.38172000  | -0.07997900 |
| C  | 0.58991900  | -0.62129400 | 1.23656000  |
| C  | 0.58965200  | -0.75997200 | -1.15633100 |
| N  | 2.66663400  | -0.00028200 | -0.00012000 |
| H  | 0.09244100  | 1.88530400  | -0.92629600 |
| H  | 0.29163300  | 1.89837800  | 0.84770600  |
| H  | 0.09228300  | -0.13994100 | 2.09579400  |
| H  | 0.29090600  | -1.68290500 | 1.22015100  |
| H  | 0.09163800  | -1.74458100 | -1.16908300 |
| H  | 0.29086400  | -0.21485200 | -2.06751600 |
| C  | 2.14208800  | 1.35866900  | -0.25135300 |
| H  | 2.63280400  | 2.05594000  | 0.44779800  |
| H  | 2.43437700  | 1.64303100  | -1.27598400 |
| C  | 2.14184900  | -0.46196800 | 1.30236300  |
| H  | 2.63216900  | -1.41628500 | 1.55665800  |
| H  | 2.43440000  | 0.28308600  | 2.06096500  |
| C  | 2.14152700  | -0.89720500 | -1.05121700 |
| H  | 2.63197100  | -0.64047400 | -2.00482000 |
| H  | 2.43367400  | -1.92680800 | -0.78526400 |
| Si | -2.59960300 | 0.00007300  | -0.00007700 |
| H  | -2.17589800 | -1.42432500 | 0.14999400  |
| H  | -2.17597300 | 0.84230100  | 1.15843400  |
| H  | -2.17612200 | 0.58237800  | -1.30869800 |
| C  | -4.50986400 | -0.00009400 | 0.00009100  |
| H  | -4.90969300 | 1.02198200  | -0.10828800 |
| H  | -4.90965300 | -0.60505300 | -0.83084400 |
| H  | -4.90953900 | -0.41728700 | 0.93948900  |

DABCO-SiH<sub>4</sub>

|   |             |             |             |
|---|-------------|-------------|-------------|
| N | -0.39932900 | 0.00004600  | -0.00000200 |
| C | 0.11639800  | 1.38243700  | 0.07353500  |
| C | 0.11632200  | -0.75486200 | 1.16043100  |
| C | 0.11633100  | -0.62749300 | -1.23397100 |
| N | 2.19261300  | -0.00004500 | 0.00000200  |
| H | -0.38101300 | 1.97684000  | -0.71187000 |
| H | -0.18222700 | 1.79343800  | 1.05262900  |
| H | -0.38109800 | -0.37186300 | 2.06788900  |
| H | -0.18235200 | -1.80826700 | 1.02680700  |
| H | -0.38113500 | -1.60485000 | -1.35602500 |

|    |             |             |             |
|----|-------------|-------------|-------------|
| H  | -0.18228200 | 0.01494300  | -2.07944700 |
| C  | 1.66817500  | 1.37822000  | -0.09910200 |
| H  | 2.15843700  | 1.99366400  | 0.67322000  |
| H  | 1.96056900  | 1.77464100  | -1.08570700 |
| C  | 1.66810300  | -0.60332400 | 1.24314900  |
| H  | 2.15831100  | -1.57992100 | 1.38999500  |
| H  | 1.96050200  | 0.05287700  | 2.07977000  |
| C  | 1.66810100  | -0.77497700 | -1.14404200 |
| H  | 2.15835700  | -0.41387600 | -2.06320700 |
| H  | 1.96044200  | -1.82762800 | -0.99405700 |
| Si | -3.05671200 | -0.00000100 | -0.00000100 |
| H  | -2.66132700 | -1.43679000 | -0.02342600 |
| H  | -2.66148400 | 0.69814100  | 1.25604100  |
| H  | -2.66148200 | 0.73873600  | -1.23260200 |
| H  | -4.56181800 | -0.00009800 | 0.00000100  |

DABCO-SiH<sub>3</sub>NH<sub>2</sub>

|    |             |             |             |
|----|-------------|-------------|-------------|
| N  | -0.01196000 | 0.00080800  | -0.01457600 |
| C  | 0.51513700  | 1.24797200  | -0.61210300 |
| C  | 0.48743700  | -0.09914600 | 1.37560300  |
| C  | 0.51626700  | -1.14662400 | -0.78559100 |
| N  | 2.58055500  | -0.00100400 | 0.02148800  |
| H  | 0.01984400  | 1.39467600  | -1.58665900 |
| H  | 0.22003400  | 2.07799900  | 0.05076700  |
| H  | -0.02905800 | 0.66597400  | 1.97938100  |
| H  | 0.19412100  | -1.09102200 | 1.75719400  |
| H  | 0.00143000  | -2.05794900 | -0.43737000 |
| H  | 0.24501500  | -0.98226700 | -1.84132600 |
| C  | 2.06511400  | 1.14580700  | -0.75501500 |
| H  | 2.55848900  | 2.06301400  | -0.39391200 |
| H  | 2.35811700  | 0.99398700  | -1.80704200 |
| C  | 2.03523500  | 0.09256000  | 1.39175800  |
| H  | 2.52368400  | -0.67340500 | 2.01606200  |
| H  | 2.30919600  | 1.08261200  | 1.79220400  |
| C  | 2.06125000  | -1.24046400 | -0.59326500 |
| H  | 2.57246700  | -1.39389900 | -1.55775400 |
| H  | 2.32958500  | -2.07881900 | 0.07066400  |
| Si | -2.43489200 | 0.00036900  | -0.03867700 |
| H  | -2.09613800 | -1.28265300 | 0.64620600  |
| H  | -2.09702100 | 1.28241100  | 0.64829100  |
| H  | -2.06739800 | 0.00172700  | -1.49410400 |
| N  | -4.22400300 | -0.00062400 | 0.13053100  |
| H  | -4.72492400 | 0.82373900  | -0.19640100 |
| H  | -4.72373800 | -0.82618700 | -0.19515500 |

DABCO-SiH<sub>3</sub>OH

|    |             |             |             |
|----|-------------|-------------|-------------|
| N  | 0.05731600  | 0.00885000  | -0.00026600 |
| C  | -0.45915100 | -0.78362600 | -1.14345900 |
| C  | -0.46012200 | -0.59024300 | 1.25465100  |
| C  | -0.47362500 | 1.38916300  | -0.11210800 |
| N  | -2.53628200 | -0.00921300 | 0.00037600  |
| H  | 0.05409000  | -0.43772600 | -2.05603000 |
| H  | -0.17378100 | -1.83318400 | -0.96638300 |
| H  | 0.06290800  | -1.54759900 | 1.41533800  |
| H  | -0.18721100 | 0.09176800  | 2.07607900  |
| H  | 0.03840400  | 2.01227000  | 0.63988400  |
| H  | -0.19951900 | 1.76227100  | -1.11211000 |
| C  | -2.00504300 | -0.61094400 | -1.23998500 |
| H  | -2.50091600 | -1.58198600 | -1.40018500 |
| H  | -2.27896800 | 0.05251400  | -2.07665000 |
| C  | -2.00330600 | -0.77741200 | 1.14433000  |
| H  | -2.50822000 | -0.43677900 | 2.06279000  |
| H  | -2.26471500 | -1.83650700 | 0.98578400  |
| C  | -2.01811400 | 1.37095400  | 0.09642600  |
| H  | -2.52532000 | 1.99062500  | -0.66076400 |
| H  | -2.28920800 | 1.76058300  | 1.09137900  |
| Si | 2.36096900  | 0.01057200  | -0.00004200 |
| H  | 2.06843900  | 0.77093100  | 1.25720100  |
| H  | 2.07780900  | -1.45174600 | -0.00118400 |
| H  | 2.06875700  | 0.77292700  | -1.25608600 |
| O  | 4.10076500  | -0.11852800 | 0.00012200  |
| H  | 4.56669600  | 0.72704200  | 0.00065000  |

DABCO-SiH<sub>3</sub>I

|   |             |             |             |
|---|-------------|-------------|-------------|
| N | -1.58933800 | 0.00000000  | 0.00000000  |
| C | -2.11314400 | -0.32135200 | 1.35635300  |
| C | -2.11314200 | 1.33531200  | -0.39987800 |
| C | -2.11314300 | -1.01396300 | -0.95647200 |
| N | -4.18051200 | 0.00000200  | -0.00000100 |
| H | -1.59228100 | -1.22382100 | 1.71622400  |
| H | -1.84144400 | 0.51923900  | 2.01466800  |
| H | -1.59227800 | 2.09820400  | 0.20174700  |
| H | -1.84144100 | 1.48513600  | -1.45700900 |
| H | -1.59227800 | -0.87438300 | -1.91796700 |
| H | -1.84144300 | -2.00437700 | -0.55765900 |
| C | -3.65486400 | -0.52501000 | 1.27603500  |
| H | -4.16042000 | -0.00765900 | 2.10685600  |
| H | -3.91623200 | -1.59408900 | 1.33183300  |

|    |             |             |             |
|----|-------------|-------------|-------------|
| C  | -3.65486100 | 1.36758900  | -0.18334700 |
| H  | -4.16041300 | 1.82842800  | -1.04679700 |
| H  | -3.91622800 | 1.95045600  | 0.71460200  |
| C  | -3.65486200 | -0.84257800 | -1.09268900 |
| H  | -4.16041500 | -1.82076700 | -1.06006400 |
| H  | -3.91622800 | -0.35636200 | -2.04643900 |
| Si | 0.58936800  | -0.00000200 | 0.00000000  |
| H  | 0.42138400  | 0.45014000  | -1.40825400 |
| H  | 0.42138500  | 0.99451100  | 1.09396100  |
| H  | 0.42138400  | -1.44465700 | 0.31429200  |
| I  | 3.19299700  | 0.00000000  | 0.00000000  |

DABCO-SiH<sub>3</sub>Br

|    |             |             |             |
|----|-------------|-------------|-------------|
| N  | 1.01451300  | 0.00003100  | 0.00018300  |
| C  | 1.53889000  | 1.39289400  | 0.02529100  |
| C  | 1.53899500  | -0.71823700 | 1.19378100  |
| C  | 1.53865500  | -0.67462400 | -1.21874600 |
| N  | 3.60671200  | -0.00004400 | -0.00018400 |
| H  | 1.01734000  | 1.96607800  | -0.75874700 |
| H  | 1.26858900  | 1.82207800  | 1.00329100  |
| H  | 1.01767900  | -0.32575000 | 2.08229300  |
| H  | 1.26849600  | -1.77975500 | 1.07651100  |
| H  | 1.01716100  | -1.64025800 | -1.32298500 |
| H  | 1.26809100  | -0.04227300 | -2.07936900 |
| C  | 3.08044700  | 1.36610300  | -0.19332200 |
| H  | 3.58669200  | 2.04348500  | 0.51272300  |
| H  | 3.34104700  | 1.68417600  | -1.21576600 |
| C  | 3.08060300  | -0.51577200 | 1.27960000  |
| H  | 3.58673500  | -1.46599900 | 1.51311100  |
| H  | 3.34146900  | 0.21061000  | 2.06623400  |
| C  | 3.08025900  | -0.85042200 | -1.08660800 |
| H  | 3.58625500  | -0.57761800 | -2.02638200 |
| H  | 3.34100200  | -1.89489900 | -0.85090800 |
| Si | -1.17415400 | 0.00008200  | 0.00000400  |
| H  | -0.98992100 | -1.47341000 | 0.09563000  |
| H  | -0.99003100 | 0.81964100  | 1.22828400  |
| H  | -0.98999900 | 0.65404100  | -1.32387500 |
| Br | -3.53508900 | -0.00002400 | -0.00000200 |

DABCO-SiH<sub>3</sub>Cl

|   |            |             |             |
|---|------------|-------------|-------------|
| N | 0.32475900 | 0.00000900  | 0.00001100  |
| C | 0.84904400 | -0.67474300 | -1.21806900 |
| C | 0.84906900 | 1.39226500  | 0.02469700  |
| C | 0.84906500 | -0.71750800 | 1.19339300  |

|    |             |             |             |
|----|-------------|-------------|-------------|
| N  | 2.91751700  | -0.00000900 | -0.00001100 |
| H  | 0.32810600  | -1.64075300 | -1.32172200 |
| H  | 0.57793400  | -0.04329700 | -2.07917900 |
| H  | 0.32813400  | 1.96504700  | -0.76005900 |
| H  | 0.57797500  | 1.82228600  | 1.00210400  |
| H  | 0.32814300  | -0.32427100 | 2.08181900  |
| H  | 0.57795200  | -1.77897300 | 1.07710100  |
| C  | 2.39096500  | -0.84984700 | -1.08690500 |
| H  | 2.89671600  | -0.57593000 | -2.02654200 |
| H  | 2.65261100  | -1.89433300 | -0.85205400 |
| C  | 2.39098700  | 1.36619700  | -0.19254100 |
| H  | 2.89675600  | 2.04298000  | 0.51449200  |
| H  | 2.65263200  | 1.68504700  | -1.21452000 |
| C  | 2.39098700  | -0.51636700 | 1.27942700  |
| H  | 2.89674200  | -1.46707600 | 1.51201700  |
| H  | 2.65265000  | 0.20926200  | 2.06654800  |
| Si | -1.87493900 | 0.00000500  | -0.00000200 |
| H  | -1.67740700 | 0.82132000  | 1.22555900  |
| H  | -1.67740900 | 0.65071800  | -1.32406000 |
| H  | -1.67740300 | -1.47201900 | 0.09849500  |
| Cl | -4.06480100 | -0.00000300 | 0.00000100  |

#### DABCO-SiH<sub>3</sub>F

|    |             |             |             |
|----|-------------|-------------|-------------|
| N  | 0.08935100  | -0.00028000 | 0.00038900  |
| C  | -0.43533400 | -0.31629800 | 1.35513100  |
| C  | -0.43451900 | 1.33139400  | -0.40335100 |
| C  | -0.43487600 | -1.01542700 | -0.95110400 |
| N  | -2.50442300 | 0.00027800  | -0.00039000 |
| H  | 0.08519500  | -1.21736400 | 1.71889900  |
| H  | -0.16428300 | 0.52611500  | 2.01126600  |
| H  | 0.08620600  | 2.09644000  | 0.19558800  |
| H  | -0.16267600 | 1.47845200  | -1.46075300 |
| H  | 0.08619700  | -0.87975400 | -1.91300800 |
| H  | -0.16388200 | -2.00487900 | -0.54961000 |
| C  | -1.97753800 | -0.52007800 | 1.27758400  |
| H  | -2.48355700 | 0.00059300  | 2.10634900  |
| H  | -2.23999000 | -1.58888800 | 1.33717800  |
| C  | -1.97675000 | 1.36690300  | -0.18869700 |
| H  | -2.48223500 | 1.82445700  | -1.05422800 |
| H  | -2.23922100 | 1.95321000  | 0.70692900  |
| C  | -1.97696100 | -0.84641100 | -1.08965900 |
| H  | -2.48302600 | -1.82446400 | -1.05330800 |
| H  | -2.23890200 | -0.36371400 | -2.04526200 |
| Si | 2.31130700  | -0.00013600 | 0.00017600  |

|   |            |             |             |
|---|------------|-------------|-------------|
| H | 2.08177300 | 0.45622500  | -1.40188500 |
| H | 2.08214200 | 0.98654200  | 1.09590900  |
| H | 2.08247500 | -1.44250000 | 0.30672000  |
| F | 4.01298500 | 0.00010600  | -0.00029600 |

DABCO-SiH<sub>3</sub>CN

|    |             |             |             |
|----|-------------|-------------|-------------|
| N  | 0.21943500  | -0.00000800 | -0.00005800 |
| C  | 0.74053700  | -0.64089900 | 1.23518300  |
| C  | 0.74065200  | -0.74930600 | -1.17266500 |
| C  | 0.74057900  | 1.39017800  | -0.06261800 |
| N  | 2.81010900  | 0.00001600  | 0.00005700  |
| H  | 0.22519900  | -0.18689300 | 2.09784300  |
| H  | 0.46241100  | -1.70628100 | 1.19012700  |
| H  | 0.22538500  | -1.72343400 | -1.21083400 |
| H  | 0.46254500  | -0.17763200 | -2.07281100 |
| H  | 0.22532100  | 1.91027600  | -0.88717100 |
| H  | 0.46240100  | 1.88386600  | 0.88253100  |
| C  | 2.28489700  | -0.44534700 | 1.30625800  |
| H  | 2.78639400  | -1.38543200 | 1.58642000  |
| H  | 2.55332700  | 0.31903600  | 2.05341200  |
| C  | 2.28501600  | -0.90853700 | -1.03877300 |
| H  | 2.78655300  | -0.68108800 | -1.99296400 |
| H  | 2.55349400  | -1.93776500 | -0.75036200 |
| C  | 2.28495600  | 1.35391400  | -0.26739100 |
| H  | 2.78642200  | 2.06657400  | 0.40669900  |
| H  | 2.55347100  | 1.61876300  | -1.30292300 |
| Si | -2.02794400 | -0.00001600 | 0.00001300  |
| H  | -1.81864400 | 0.57769000  | -1.35754700 |
| H  | -1.81866300 | -1.46452900 | 0.17856000  |
| H  | -1.81861300 | 0.88686700  | 1.17903900  |
| C  | -3.96612100 | 0.00000800  | 0.00000100  |
| N  | -5.15795600 | 0.00001200  | -0.00002300 |

DABCO-SiH<sub>3</sub>NO<sub>2</sub>

|   |             |             |             |
|---|-------------|-------------|-------------|
| N | -0.57677500 | -0.00968900 | -0.00063600 |
| C | -1.10840100 | -0.80821600 | -1.14296200 |
| C | -1.10555100 | -0.59426600 | 1.26584800  |
| C | -1.09169400 | 1.38517800  | -0.12406400 |
| N | -3.16702000 | 0.00952900  | 0.00086200  |
| H | -0.58269600 | -0.48506200 | -2.05611400 |
| H | -0.84812000 | -1.86058800 | -0.94853300 |
| H | -0.58815600 | -1.55182500 | 1.43912700  |
| H | -0.83287000 | 0.09810700  | 2.07786000  |
| H | -0.56135000 | 2.00896600  | 0.61353400  |

|    |             |             |             |
|----|-------------|-------------|-------------|
| H  | -0.82205300 | 1.73927900  | -1.13148300 |
| C  | -2.64701000 | -0.59395900 | -1.24189700 |
| H  | -3.16179000 | -1.55242400 | -1.41361100 |
| H  | -2.89955700 | 0.08167700  | -2.07481300 |
| C  | -2.64702600 | -0.77071800 | 1.14097100  |
| H  | -3.15162400 | -0.43497000 | 2.06063600  |
| H  | -2.91191600 | -1.82712900 | 0.97405600  |
| C  | -2.63144800 | 1.38151900  | 0.10269700  |
| H  | -3.13503000 | 2.01553800  | -0.64400300 |
| H  | -2.88495000 | 1.76775900  | 1.10299200  |
| Si | 1.54482700  | -0.02426300 | -0.00082300 |
| H  | 1.44444800  | 0.72242900  | 1.28415900  |
| H  | 1.43149300  | -1.50926800 | -0.00660000 |
| H  | 1.44493400  | 0.73277400  | -1.27977700 |
| N  | 3.49846600  | -0.00665300 | -0.00002700 |
| O  | 4.15794800  | -1.06959700 | 0.00043200  |
| O  | 4.03402100  | 1.12520700  | 0.00071100  |

DABCO-GeH<sub>3</sub>Me

|   |             |             |             |
|---|-------------|-------------|-------------|
| N | 0.56245800  | -0.00011100 | -0.00008000 |
| C | 1.07625400  | -1.36864300 | -0.19950900 |
| C | 1.07611800  | 0.85697100  | -1.08552700 |
| C | 1.07598300  | 0.51147900  | 1.28490800  |
| N | 3.15301000  | 0.00012400  | 0.00010000  |
| H | 0.58011000  | -2.03143700 | 0.53028100  |
| H | 0.77460100  | -1.68901900 | -1.21120500 |
| H | 0.58004600  | 0.55624600  | -2.02442200 |
| H | 0.77424800  | 1.89325400  | -0.85714500 |
| H | 0.57971200  | 1.47484600  | 1.49392600  |
| H | 0.77424100  | -0.20452400 | 2.06814100  |
| C | 2.62879600  | -1.38179100 | -0.03106800 |
| H | 3.11834000  | -1.92075100 | -0.85919000 |
| H | 2.92358300  | -1.86955600 | 0.91310600  |
| C | 2.62868600  | 0.71796700  | -1.18110200 |
| H | 3.11804200  | 1.70471500  | -1.23378100 |
| H | 2.92361000  | 0.14422600  | -2.07559500 |
| C | 2.62852100  | 0.66406000  | 1.21235300  |
| H | 3.11794400  | 0.21641000  | 2.09325700  |
| H | 2.92322900  | 1.72564500  | 1.16273200  |
| H | -1.75832300 | 1.45926200  | 0.17759700  |
| H | -1.75853700 | -0.57582600 | -1.35273500 |
| H | -1.75840900 | -0.88362300 | 1.17488300  |
| C | -4.18787300 | 0.00010000  | 0.00011500  |
| H | -4.58004400 | -1.02179100 | -0.12469100 |

|    |             |             |             |
|----|-------------|-------------|-------------|
| H  | -4.57983200 | 0.40295600  | 0.94759100  |
| H  | -4.58000600 | 0.61921300  | -0.82242000 |
| Ge | -2.21061700 | -0.00003800 | -0.00004600 |

DABCO-GeH<sub>4</sub>

|    |             |             |             |
|----|-------------|-------------|-------------|
| N  | 0.20975800  | -0.00010500 | 0.00023700  |
| C  | 0.72403500  | -0.42856100 | 1.31549600  |
| C  | 0.72365800  | -0.92495300 | -1.02861300 |
| C  | 0.72360700  | 1.35331400  | -0.28643700 |
| N  | 2.80029600  | 0.00010900  | -0.00023900 |
| H  | 0.22950700  | 0.17942800  | 2.09258000  |
| H  | 0.42126100  | -1.47947500 | 1.46101900  |
| H  | 0.22914200  | -1.90190600 | -0.89044600 |
| H  | 0.42054500  | -0.52551600 | -2.01138400 |
| H  | 0.22878500  | 1.72217300  | -1.20140200 |
| H  | 0.42083400  | 2.00469800  | 0.55099700  |
| C  | 2.27682800  | -0.26697700 | 1.35613700  |
| H  | 2.76533600  | -1.17602700 | 1.74449600  |
| H  | 2.57327500  | 0.57893800  | 1.99859500  |
| C  | 2.27648200  | -1.04099000 | -0.90954500 |
| H  | 2.76464700  | -0.92282000 | -1.89116000 |
| H  | 2.57304000  | -2.02033900 | -0.49828600 |
| C  | 2.27637600  | 1.30815600  | -0.44702200 |
| H  | 2.76478300  | 2.09915900  | 0.14594300  |
| H  | 2.57255200  | 1.44165400  | -1.50090200 |
| H  | -2.14389300 | 0.44296900  | -1.40237900 |
| H  | -2.14421200 | -1.43603900 | 0.31767900  |
| H  | -2.14422500 | 0.99302600  | 1.08492200  |
| H  | -4.12739500 | 0.00005300  | -0.00026600 |
| Ge | -2.57750900 | 0.00000200  | -0.00000300 |

DABCO-GeH<sub>3</sub>NH<sub>2</sub>

|   |            |             |             |
|---|------------|-------------|-------------|
| N | 0.46219400 | 0.00107500  | -0.00615300 |
| C | 0.98258600 | 1.23554500  | -0.63007100 |
| C | 0.96750700 | -0.07319600 | 1.38106500  |
| C | 0.98161500 | -1.16009000 | -0.75832100 |
| N | 3.05189900 | -0.00120700 | 0.01250200  |
| H | 0.48680300 | 1.35957300  | -1.60796400 |
| H | 0.68471700 | 2.07921600  | 0.01482000  |
| H | 0.46096400 | 0.70877300  | 1.97213900  |
| H | 0.66940700 | -1.05479100 | 1.78594900  |
| H | 0.47494600 | -2.06559700 | -0.38286400 |
| H | 0.69542900 | -1.02043900 | -1.81415100 |
| C | 2.53354400 | 1.13808800  | -0.77316100 |



|    |             |             |             |
|----|-------------|-------------|-------------|
| H  | 3.02556600  | 2.05898700  | -0.41945600 |
| H  | 2.82668900  | 0.97813900  | -1.82400700 |
| C  | 2.51744100  | 0.10725100  | 1.38606600  |
| H  | 3.00608000  | -0.65688800 | 2.01258500  |
| H  | 2.80127000  | 1.09879100  | 1.77597200  |
| C  | 2.53007500  | -1.24757200 | -0.58606900 |
| H  | 3.03081800  | -1.40620100 | -1.55528400 |
| H  | 2.80994900  | -2.07943100 | 0.08134200  |
| H  | -1.72456900 | -1.30565700 | 0.70538500  |
| H  | -1.72639100 | 1.30983300  | 0.69912900  |
| H  | -1.70045400 | -0.00352400 | -1.51511200 |
| N  | -3.97593100 | -0.00048800 | 0.14673800  |
| H  | -4.42974700 | 0.81787100  | -0.26183400 |
| H  | -4.42940900 | -0.81918400 | -0.26158500 |
| Ge | -2.08768200 | 0.00014700  | -0.01855400 |

DABCO-GeH<sub>3</sub>OH

|    |             |             |             |
|----|-------------|-------------|-------------|
| N  | -0.40132700 | 0.00704700  | -0.00029500 |
| C  | -0.91385700 | -0.78116900 | -1.14486900 |
| C  | -0.91449400 | -0.59443200 | 1.25220700  |
| C  | -0.92647600 | 1.38735000  | -0.10809200 |
| N  | -2.99053900 | -0.00882900 | 0.00039600  |
| H  | -0.40729600 | -0.42543100 | -2.05787200 |
| H  | -0.62024900 | -1.83028200 | -0.97588200 |
| H  | -0.39899200 | -1.55767300 | 1.40453400  |
| H  | -0.63195900 | 0.08029500  | 2.07700000  |
| H  | -0.42099500 | 2.00513800  | 0.65329500  |
| H  | -0.64262800 | 1.76722800  | -1.10334600 |
| C  | -2.46226900 | -0.62010800 | -1.23652800 |
| H  | -2.95410400 | -1.59532100 | -1.38376800 |
| H  | -2.74429600 | 0.03347400  | -2.07831800 |
| C  | -2.46063100 | -0.76987600 | 1.15053000  |
| H  | -2.96067000 | -0.41542100 | 2.06649500  |
| H  | -2.73138400 | -1.82828700 | 1.00317600  |
| C  | -2.47381500 | 1.37250300  | 0.08670300  |
| H  | -2.97572200 | 1.98355500  | -0.68104000 |
| H  | -2.75341300 | 1.77187500  | 1.07547200  |
| H  | 1.71599300  | 0.78680300  | 1.29684500  |
| H  | 1.72799400  | -1.49763300 | 0.00154700  |
| H  | 1.71658500  | 0.78402300  | -1.29871200 |
| O  | 3.86596900  | -0.12671800 | 0.00031400  |
| H  | 4.30324200  | 0.73553400  | -0.00067000 |
| Ge | 2.01570100  | 0.00821100  | -0.00005300 |

DABCO-GeH<sub>3</sub>I

|    |             |             |             |
|----|-------------|-------------|-------------|
| N  | -1.75810300 | 0.00000000  | -0.00000100 |
| C  | -2.27676500 | 0.67108000  | 1.21910700  |
| C  | -2.27676100 | 0.72024200  | -1.19072300 |
| C  | -2.27676200 | -1.39131900 | -0.02838500 |
| N  | -4.34547700 | -0.00000200 | -0.00000200 |
| H  | -1.76249500 | 0.23628300  | 2.09250900  |
| H  | -1.99643200 | 1.73475000  | 1.14829200  |
| H  | -1.76248900 | 1.69402900  | -1.25088100 |
| H  | -1.99642800 | 0.12707800  | -2.07647900 |
| H  | -1.76249200 | -1.93031200 | -0.84163100 |
| H  | -1.99642900 | -1.86182700 | 0.92818600  |
| C  | -3.82157300 | 0.48017200  | 1.29458200  |
| H  | -4.32283700 | 1.42780800  | 1.54862600  |
| H  | -4.09145900 | -0.26385200 | 2.06152200  |
| C  | -3.82156900 | 0.88106300  | -1.06312900 |
| H  | -4.32283200 | 0.62724800  | -2.01082500 |
| H  | -4.09145500 | 1.91726900  | -0.80226600 |
| C  | -3.82156900 | -1.36123400 | -0.23145200 |
| H  | -4.32282600 | -2.05506100 | 0.46220700  |
| H  | -4.09145300 | -1.65342600 | -1.25926300 |
| H  | 0.34805000  | -0.63017700 | -1.38050500 |
| H  | 0.34805000  | 1.51064200  | 0.14450400  |
| H  | 0.34805000  | -0.88046400 | 1.23600300  |
| Ge | 0.55537600  | 0.00000000  | 0.00000100  |
| I  | 3.21129300  | 0.00000000  | 0.00000000  |

DABCO-GeH<sub>3</sub>Br

|   |            |             |             |
|---|------------|-------------|-------------|
| N | 1.26011200 | 0.00003700  | -0.00004600 |
| C | 1.77897600 | 0.82204700  | -1.12247800 |
| C | 1.77890400 | 0.56108200  | 1.27309000  |
| C | 1.77889300 | -1.38306500 | -0.15069100 |
| N | 3.84778700 | -0.00004400 | 0.00006000  |
| H | 1.26421500 | 0.50386200  | -2.04446600 |
| H | 1.49948300 | 1.86788500  | -0.91517200 |
| H | 1.26416900 | 1.51865500  | 1.45852400  |
| H | 1.49935300 | -0.14135400 | 2.07515600  |
| H | 1.26408900 | -2.02242300 | 0.58584300  |
| H | 1.49940800 | -1.72644500 | -1.16007000 |
| C | 3.32364900 | 0.64174600  | -1.22245800 |
| H | 3.82531600 | 1.61384900  | -1.35362200 |
| H | 3.59309100 | 0.00163200  | -2.07821800 |
| C | 3.32359300 | 0.73780700  | 1.16708200  |
| H | 3.82519600 | 0.36534100  | 2.07456400  |

|    |             |             |             |
|----|-------------|-------------|-------------|
| H  | 3.59306400  | 1.79897000  | 1.04062100  |
| C  | 3.32356300  | -1.37963500 | 0.05549800  |
| H  | 3.82520900  | -1.97930500 | -0.72077800 |
| H  | 3.59295500  | -1.80071700 | 1.03773600  |
| H  | -0.84201200 | -0.79258200 | 1.29361900  |
| H  | -0.84212800 | 1.51668800  | 0.03943700  |
| H  | -0.84222100 | -0.72405300 | -1.33332600 |
| Br | -3.48312700 | -0.00001200 | 0.00003300  |
| Ge | -1.05345300 | 0.00001800  | -0.00004200 |

DABCO-GeH<sub>3</sub>Cl

|    |             |             |             |
|----|-------------|-------------|-------------|
| N  | -0.68794700 | -0.00000200 | 0.00000100  |
| C  | -1.20674100 | 0.91806700  | 1.04507500  |
| C  | -1.20674000 | 0.44602800  | -1.31760600 |
| C  | -1.20674500 | -1.36409700 | 0.27253200  |
| N  | -3.27600400 | 0.00000300  | -0.00000100 |
| H  | -0.69310500 | 0.68148800  | 1.99188600  |
| H  | -0.92555600 | 1.94125300  | 0.74701500  |
| H  | -0.69310100 | 1.38427800  | -1.58612900 |
| H  | -0.92555800 | -0.32369300 | -2.05468300 |
| H  | -0.69311000 | -2.06577100 | -0.40575600 |
| H  | -0.92556300 | -1.61756500 | 1.30766800  |
| C  | -2.75186100 | 0.74954900  | 1.15953400  |
| H  | -3.25251800 | 1.73012300  | 1.20111800  |
| H  | -3.02303600 | 0.19027500  | 2.06968500  |
| C  | -2.75186000 | 0.62941500  | -1.22889400 |
| H  | -3.25251800 | 0.17514200  | -2.09888900 |
| H  | -3.02303100 | 1.69726700  | -1.19962400 |
| C  | -2.75186500 | -1.37895900 | 0.06935800  |
| H  | -3.25252400 | -1.90525700 | 0.89776800  |
| H  | -3.02303900 | -1.88753500 | -0.87006300 |
| H  | 1.41413300  | -0.90365900 | -1.21870400 |
| H  | 1.41413100  | 1.50725600  | -0.17323700 |
| H  | 1.41413400  | -0.60360300 | 1.39194300  |
| Cl | 3.90074200  | 0.00000200  | -0.00000100 |
| Ge | 1.62906800  | -0.00000200 | 0.00000100  |

DABCO-GeH<sub>3</sub>F

|   |             |             |             |
|---|-------------|-------------|-------------|
| N | -0.35807000 | 0.00000200  | 0.00000600  |
| C | -0.87668000 | -1.34746200 | -0.34370800 |
| C | -0.87669000 | 0.37607000  | 1.33879800  |
| C | -0.87668100 | 0.97139800  | -0.99507800 |
| N | -2.94654700 | -0.00000200 | -0.00000700 |
| H | -0.36321500 | -1.68662600 | -1.25881400 |

|    |             |             |             |
|----|-------------|-------------|-------------|
| H  | -0.59501800 | -2.02347600 | 0.47987600  |
| H  | -0.36323400 | -0.24685700 | 2.09007800  |
| H  | -0.59502600 | 1.42732000  | 1.51245600  |
| H  | -0.36322500 | 1.93348800  | -0.83124400 |
| H  | -0.59500800 | 0.59616500  | -1.99231400 |
| C  | -2.42195000 | -1.27374200 | -0.53280500 |
| H  | -2.92245300 | -2.10601500 | -0.01234000 |
| H  | -2.69384700 | -1.32713200 | -1.59958500 |
| C  | -2.42196100 | 0.17545100  | 1.36948800  |
| H  | -2.92246600 | 1.04232600  | 1.83002000  |
| H  | -2.69386700 | -0.72171100 | 1.94911400  |
| C  | -2.42195300 | 1.09828800  | -0.83669600 |
| H  | -2.92244900 | 1.06368400  | -1.81770200 |
| H  | -2.69386100 | 2.04884000  | -0.34954600 |
| H  | 1.74308600  | 1.43452800  | 0.50146500  |
| H  | 1.74308500  | -1.15154700 | 0.99160900  |
| H  | 1.74307600  | -0.28299300 | -1.49306700 |
| F  | 3.78612400  | 0.00000500  | -0.00000600 |
| Ge | 1.96647200  | -0.00000200 | 0.00000200  |

DABCO-GeH<sub>3</sub>CN

|   |             |             |             |
|---|-------------|-------------|-------------|
| N | -0.62733100 | 0.00000100  | -0.00000400 |
| C | -1.14391500 | 0.86598800  | 1.08592400  |
| C | -1.14392100 | 0.50745500  | -1.29292900 |
| C | -1.14391700 | -1.37343700 | 0.20699400  |
| N | -3.21479500 | -0.00000200 | 0.00000700  |
| H | -0.63682300 | 0.57943400  | 2.02284500  |
| H | -0.85596800 | 1.90208500  | 0.84234600  |
| H | -0.63683500 | 1.46213300  | -1.51323100 |
| H | -0.85596900 | -0.22154000 | -2.06842100 |
| H | -0.63683700 | -2.04156400 | -0.50963500 |
| H | -0.85596100 | -1.68054200 | 1.22606500  |
| C | -2.69163600 | 0.70363500  | 1.18840800  |
| H | -3.18791900 | 1.68459100  | 1.26315800  |
| H | -2.97032100 | 0.11281900  | 2.07619300  |
| C | -2.69164400 | 0.67737000  | -1.20356100 |
| H | -3.18792800 | 0.25162100  | -2.09046600 |
| H | -2.97033800 | 1.74162000  | -1.13579400 |
| C | -2.69163900 | -1.38100800 | 0.01517000  |
| H | -3.18791500 | -1.93621900 | 0.82733500  |
| H | -2.97033600 | -1.85444700 | -0.94037900 |
| H | 1.52084400  | -0.86187000 | -1.24047500 |
| H | 1.52084400  | 1.50521400  | -0.12617500 |
| H | 1.52084000  | -0.64334100 | 1.36663100  |

|    |            |             |             |
|----|------------|-------------|-------------|
| C  | 3.77804400 | -0.00000100 | 0.00000300  |
| N  | 4.96983200 | -0.00000300 | 0.00001600  |
| Ge | 1.77713900 | 0.00000100  | -0.00000600 |

DABCO-GeH<sub>3</sub>NO<sub>2</sub>

|    |             |             |             |
|----|-------------|-------------|-------------|
| N  | -0.88430400 | -0.00415200 | -0.00047300 |
| C  | -1.40680500 | -0.80290000 | -1.14140700 |
| C  | -1.40501200 | -0.59036300 | 1.26364700  |
| C  | -1.39774200 | 1.38668900  | -0.12316500 |
| N  | -3.46965200 | 0.00587200  | 0.00071200  |
| H  | -0.88948000 | -0.46871500 | -2.05596200 |
| H  | -1.13256300 | -1.85348100 | -0.95354100 |
| H  | -0.89161100 | -1.55191300 | 1.42966900  |
| H  | -1.12451100 | 0.09661300  | 2.07829300  |
| H  | -0.87721200 | 2.00895000  | 0.62341600  |
| H  | -1.11886200 | 1.74695700  | -1.12644800 |
| C  | -2.94965100 | -0.60950400 | -1.23637800 |
| H  | -3.45587600 | -1.57549800 | -1.39114400 |
| H  | -3.21423800 | 0.05191000  | -2.07705000 |
| C  | -2.94923000 | -0.76093300 | 1.14991000  |
| H  | -3.44985600 | -0.40948000 | 2.06598600  |
| H  | -3.22012100 | -1.81821000 | 0.99827300  |
| C  | -2.94103900 | 1.38171600  | 0.08797500  |
| H  | -3.44169000 | 2.00209800  | -0.67217600 |
| H  | -3.20568500 | 1.78036100  | 1.08058200  |
| H  | 1.23076200  | 0.75954100  | 1.31872500  |
| H  | 1.22357300  | -1.54089500 | -0.00619300 |
| H  | 1.23158300  | 0.76989800  | -1.31354000 |
| N  | 3.39644300  | -0.00243700 | 0.00021900  |
| O  | 4.04306700  | -1.07275500 | 0.00037600  |
| O  | 3.94789000  | 1.12132100  | 0.00066500  |
| Ge | 1.35648700  | -0.01280800 | -0.00043500 |
